# Supplementary material for: Tepotinib Inhibits Several Drug Efflux Transporters and Biotransformation Enzymes: The Role in Drug-Drug Interactions and Targeting Cytostatic Resistance In Vitro and Ex Vivo
Source: MDPI journal article supplement (doi:10.3390/ijms222111936), 2021-11-03
Supplement: s1 [file s1]

## Supplementary Tables

Table S1. Basic characteristics of tumor biopsies donated by NSCLC patients. None of the patients underwent neoadjuvant chemotherapy.

| Sample No. | gender | age | histopathological<br>diagnosis            |
|------------|--------|-----|-------------------------------------------|
| 1          | male   | 70  | squamous carcinoma                        |
| 2          | male   | 70  | squamous carcinoma                        |
| 3          | female | 56  | large cell<br>neuroendocrine<br>carcinoma |
| 4          | male   | 75  | squamous carcinoma                        |
| 5          | male   | 51  | large cell<br>neuroendocrine<br>carcinoma |
| 6          | male   | 73  | adenocarcinoma                            |

Table S2. IC<sub>50</sub>-shift analysis of the combination effects of 5 or 10 μM tepotinib for ABCB1 or ABCG2, respectively, with substrate cytostatics in MDCKII, A431 and HL60 cell lines.

| Cell line     | Drug(s)                  | IC <sub>50</sub> <sup>a</sup> (μM) | 95 % CI (μM)    | R <sub>R</sub> <sup>b</sup> |
|---------------|--------------------------|------------------------------------|-----------------|-----------------------------|
| MDCKII-parent |                          |                                    |                 |                             |
|               | daunorubicin             | 0.947                              | (0.814 - 1.07)  |                             |
|               | mitoxantrone             | 1.59                               | (1.39 - 1.64)   |                             |
|               | daunorubicin + tepotinib | 1.00 <sup>ns</sup>                 | (0.894 – 1.08)  | 0.947                       |
|               | mitoxantrone + tepotinib | 1.31 <sup>ns</sup>                 | (1.17 – 1.47)   | 1.21                        |
| MDCKII-ABCB1  |                          |                                    |                 |                             |
|               | daunorubicin             | 11.9                               | (10.7 - 12.9)   |                             |
|               | daunorubicin + tepotinib | 0.819 <sup>***</sup>               | (0.791 – 0.867) | 14.5                        |
| MDCKII-ABCG2  |                          |                                    |                 |                             |
|               | mitoxantrone             | 9.98                               | (8.91 - 11.5)   |                             |
|               | mitoxantrone + tepotinib | 1.47 <sup>**</sup>                 | (1.36 - 1.69)   | 6.79                        |
| A431-parent   |                          |                                    |                 |                             |
|               | daunorubicin             | 1.99                               | (1.54 – 2.37)   |                             |
|               | mitoxantrone             | 2.10                               | (1.54 – 2.37)   |                             |
|               | daunorubicin + tepotinib | 1.67 <sup>ns</sup>                 | (1.15 – 2.23)   | 1.19                        |
|               | mitoxantrone + tepotinib | 1.40 <sup>ns</sup>                 | (0.959 – 1.64)  | 1.50                        |
| A431-ABCB1    |                          |                                    |                 |                             |
|               | daunorubicin             | 21.7                               | (1.61 - 2.53)   |                             |
|               | daunorubicin + tepotinib | 5.70 <sup>****</sup>               | (4.43 – 6.79)   | 3.80                        |
| A431-ABCG2    |                          |                                    |                 |                             |
|               | mitoxantrone             | 56.5                               | (37.86 – 93.6)  |                             |
|               | mitoxantrone + tepotinib | 5.57 <sup>***</sup>                | (3.67 – 7.15)   | 10.1                        |
| HL60-parent   |                          |                                    |                 |                             |

|            |                          |                        |                    |       |
|------------|--------------------------|------------------------|--------------------|-------|
|            | daunorubicin             | 0.0531                 | (0.0473 - 0.0589)  |       |
|            | mitoxantrone             | 0.0305                 | (0.230 - 0.0370)   |       |
|            | daunorubicin + tepotinib | 0.0537 <sup>ns</sup>   | (0.0423 - 0.0565)  | 0.989 |
|            | mitoxantrone + tepotinib | 0.0363 <sup>ns</sup>   | (0.00301 - 0.0429) | 0.840 |
| HL60-ABCB1 |                          |                        |                    |       |
|            | daunorubicin             | 2.14                   | (1.61 - 2.53)      |       |
|            | daunorubicin + tepotinib | 0.0729 <sup>****</sup> | (0.0519 - 0.111)   | 29.4  |
| HL60-ABCG2 |                          |                        |                    |       |
|            | mitoxantrone             | 0.669                  | (0.520 - 0.823)    |       |
|            | mitoxantrone + tepotinib | 0.209 <sup>*</sup>     | (0.142 - 0.270)    | 3.20  |

---

<sup>a</sup> These values were calculated using the data shown in Fig. 3A. The IC<sub>50</sub> values from the combinations were compared to those from daunorubicin or mitoxantrone alone in the appropriate cell lines using the two-tailed unpaired *t*-test (\**p* < 0.05; \*\**p* < 0.01; \*\*\**p* < 0.001; \*\*\*\**p* < 0.0001).

<sup>b</sup> Reversal ratio (R<sub>R</sub>) is the ratio of the IC<sub>50</sub> from single drug treatment to that from the combined drug treatment in the cell line of interest.

## Supplementary Figures

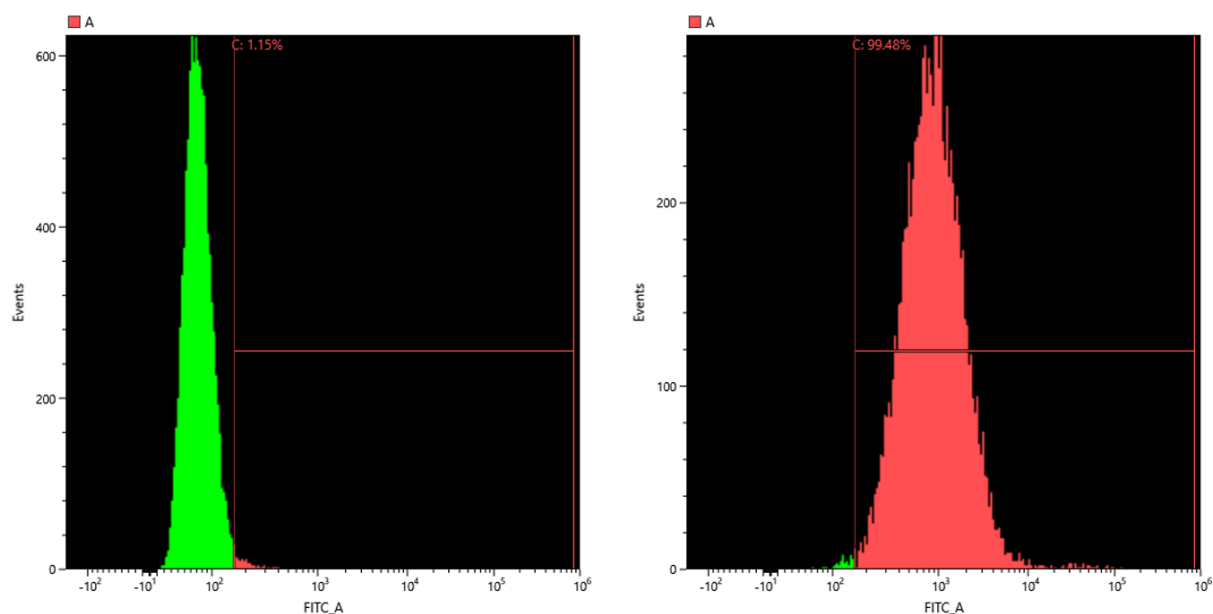

Figure S1. Representative histograms from the analysis of origin of isolated primary NSCLC cells. The cells isolated from lung tumors were characterized as epithelial via the expression of cytokeratin 18 using flow cytometry. Histograms represent isotype control (green-filled) versus cytokeratin 18-positive cells (pink-filled).

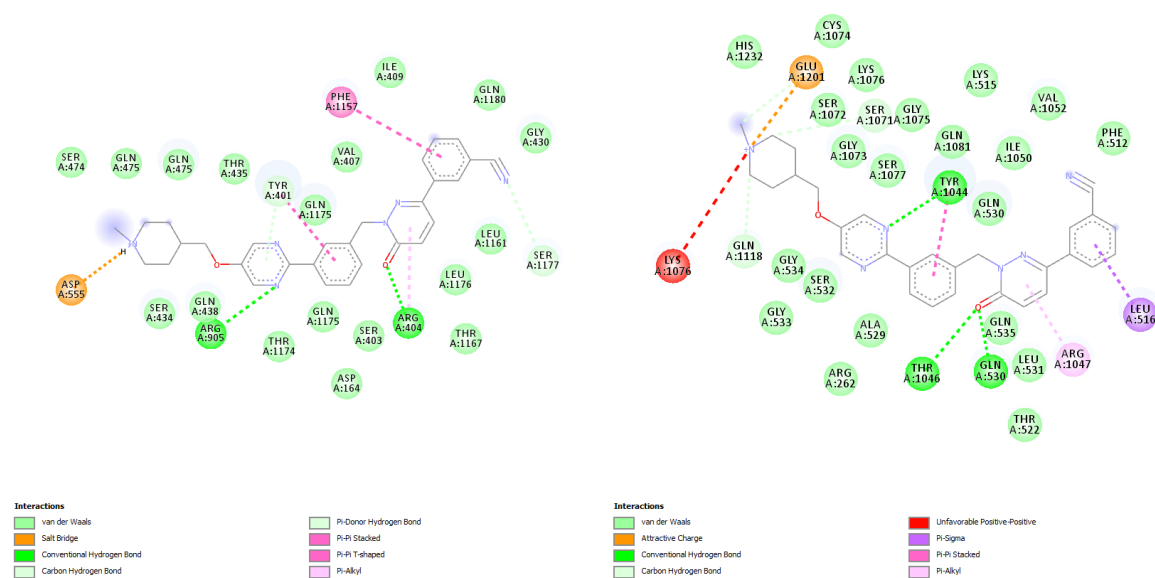

Figure S2. Two-dimensional diagrams of predicted interactions of tepotinib with nucleotide binding domain 1 (left; -11.3 kcal/mol) and nucleotide binding domain 2 (right; -11.9 kcal/mol) of ABCB1.
